# Supplementary material
Source: MDPI journal article supplement (https://www.mdpi.com/2072-4292/15/4/1025)
Supplement: s1 [file s1]

## Supplementary materials

**Table S1.** Data list of remote sensing images in 2017.

| Image resource | Orbit         | Product serial number (date)  | Cloudiness |
|----------------|---------------|-------------------------------|------------|
| Landsat8       | 118029、118030 | 92 (2017/4/2)                 | 10%        |
| Landsat8       | 118029、118030 | 156 (2017/6/5)                | 10%        |
| Landsat8       | 118029、118030 | 268 (2017/9/25)               | 10%        |
| Landsat8       | 118029、118030 | 300 (2017/10/27)              | 10%        |
| MOD11A1        | h27v04、h26v04 | 145-264 (2017/5/25-2017/9/21) | -          |

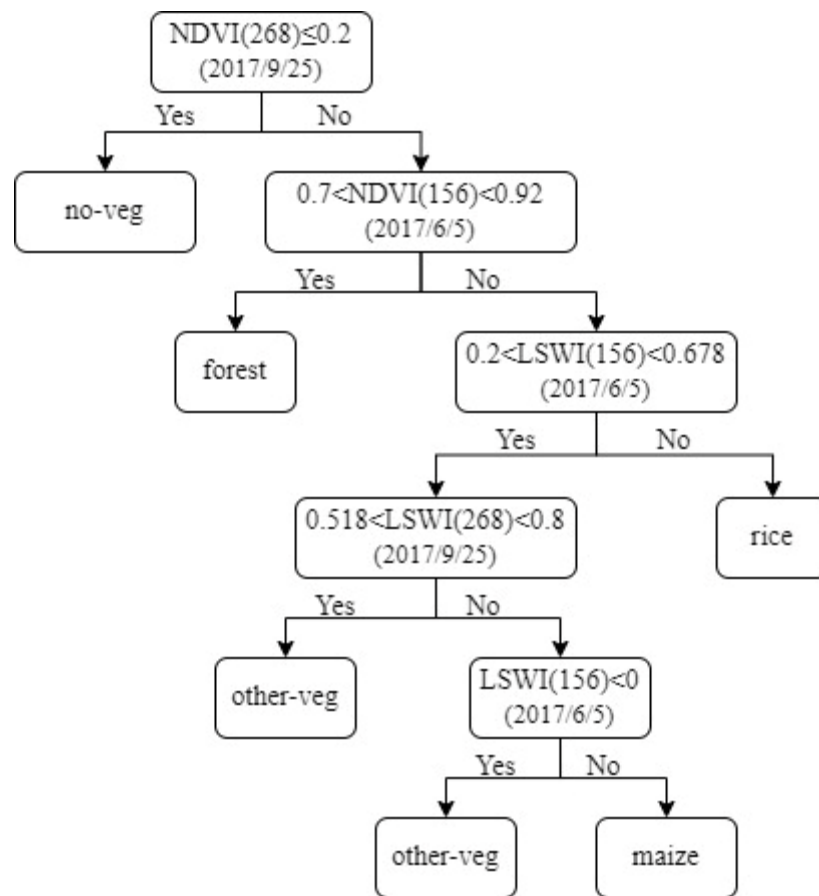

**Figure S1.** Rules of decision tree classification for Landsat8 images based on the values of NDVI and LSWI in ROI in 2017 (No.268 (2017/9/25) and No.156 (2017/6/5)).

**Table S2.** Values of harvest index (HI) of maize collected or measured in Changchun and its surrounding areas.

|                                          | Subarea     | Longitude | Latitude | HI    |
|------------------------------------------|-------------|-----------|----------|-------|
| Collected in Changchun surrounding areas | Qianguo     | 124.870   | 45.080   | 0.500 |
|                                          | Changling   | 123.970   | 44.250   | 0.550 |
|                                          | Shulan      | 126.930   | 44.380   | 0.490 |
|                                          | Yongji      | 126.520   | 43.700   | 0.550 |
| Collected in Changchun area              | Nongan      | 125.150   | 44.380   | 0.530 |
|                                          | Yushu       | 126.520   | 44.850   | 0.450 |
|                                          | Gongzhuling | 124.800   | 44.520   | 0.520 |
|                                          | Shuangyang  | 125.630   | 43.550   | 0.460 |
| Measured in the experimental station     | H1          | 125.320   | 43.645   | 0.484 |
|                                          | H2          | 125.312   | 43.643   | 0.450 |
|                                          | H3          | 125.297   | 43.643   | 0.489 |
|                                          | H4          | 125.307   | 43.648   | 0.512 |
|                                          | H5          | 125.323   | 43.656   | 0.530 |
|                                          | S1          | 125.309   | 43.642   | 0.517 |
|                                          | S2          | 125.300   | 43.647   | 0.542 |
|                                          | S3          | 125.298   | 43.651   | 0.511 |
|                                          | S4          | 125.306   | 43.652   | 0.491 |
|                                          | S5          | 125.312   | 43.653   | 0.516 |
|                                          | S6          | 125.315   | 43.652   | 0.533 |
|                                          | S7          | 125.318   | 43.655   | 0.527 |
|                                          | S8          | 125.322   | 43.650   | 0.473 |

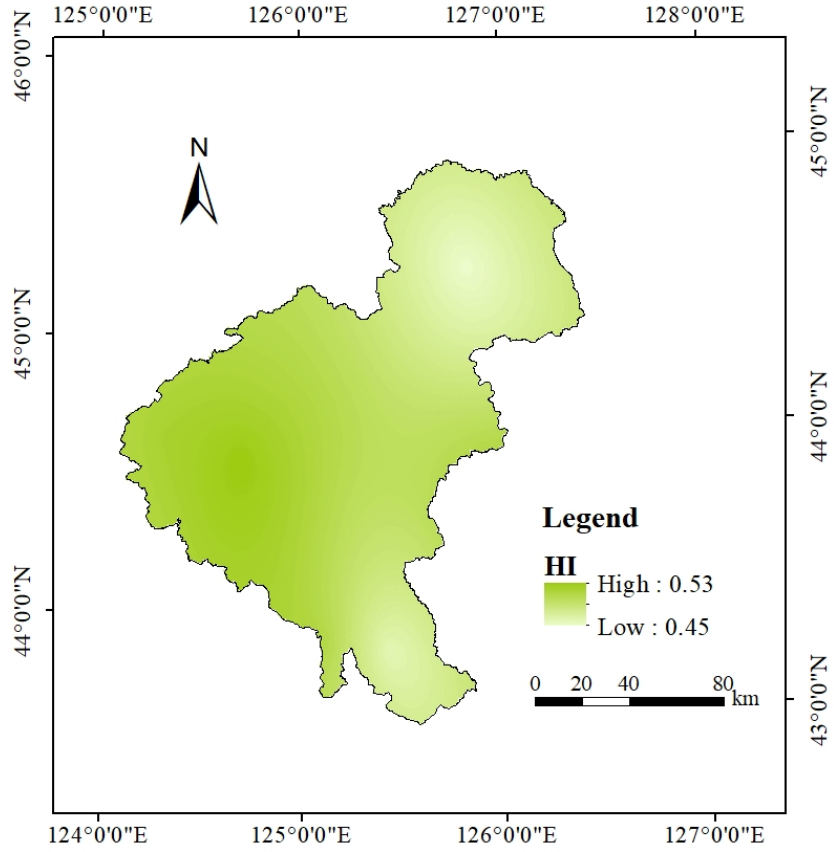

**Figure S2.** Map of HI obtained by the kriging interpolation method in Changchun area.

#### Supplementary calculation formula of Section 2.6

$$d = \frac{\sum_{i=1}^n (P_i - O_i)^2}{\sum_{i=1}^n (|P_i - \bar{O}| + |O_i - \bar{O}|)^2} \quad (\text{Equation(S1)})$$

$$RMSE = \sqrt{\frac{\sum_{i=1}^n (P_i - O_i)^2}{n}} \quad (\text{Equation(S2)})$$

$$R^2 = \frac{[\sum (P_i - \bar{P})(O_i - \bar{O})]^2}{\sum (P_i - \bar{P})^2 \sum (O_i - \bar{O})^2} \quad (\text{Equation(S3)})$$

$$RE = \frac{P_i - O_i}{O_i} \quad (\text{Equation(S4)})$$

$$CV = \frac{SD}{MN} \quad (\text{Equation(S5)})$$

Where  $P_i$  is the simulated value,  $\bar{P}$  is the average value of  $P_i$ ,  $O_i$  is the measured value,  $\bar{O}$  is the average value of  $O_i$ ,  $n$  is the number of samples,  $SD$  is the standard deviation,  $MN$  is the mean values.

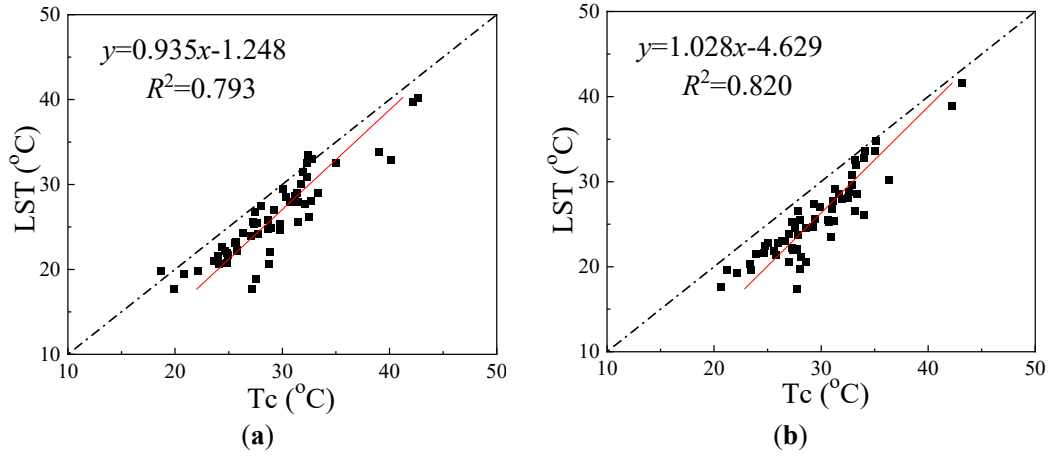

**Figure S3.** Regressions between the LST from MOD11A1 product and the observed Tc in field in 2017. (a) H4; (b) H5.

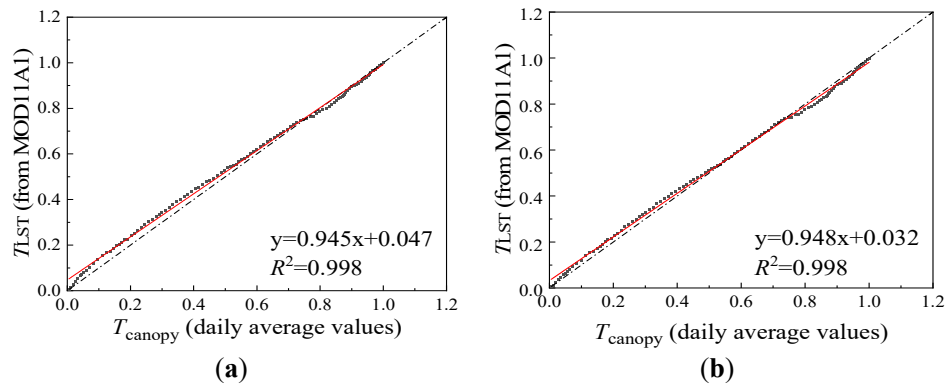

**Figure S4.** Regressions between the  $T_{LST}$  calculated by the remote sensing instantaneous LST values at 11:30 am (interpolation results) and daily average values observed ( $T_{canopy}$ ) from the CTMS system in 2017. (a) H4; (b) H5.
